# Supplementary material for: Defining the Cardiac Fibroblast Secretome in a Fibrotic Microenvironment
Source: PubMed Central journal article supplement — J Am Heart Assoc. 2020 Sep 13;9(19):e017025. doi: 10.1161/JAHA.120.017025 (PMC7792426; doi:10.1161/jaha.120.017025), 2020-09-13
Supplement: JAH3-9-e017025-s001.pdf [file JAH3-9-e017025-s001.pdf]

# **Supplemental Material**

**Figure S1. In-situ rheology measurements of shear storage modulus converted to Young's Modulus (N=3, error bars show mean and standard deviation).**

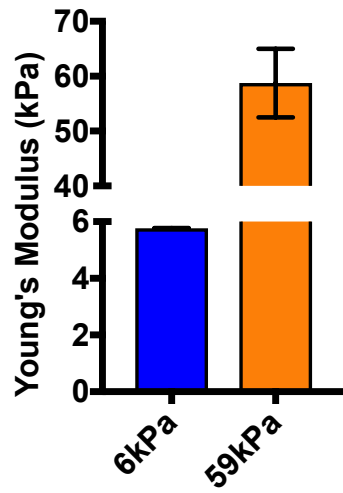

**Figure S2. SMAD 2/3 IHC staining and pAKT Western Blot images in Vehicle or Isoproterenol treated rat left ventricle tissue sections.**

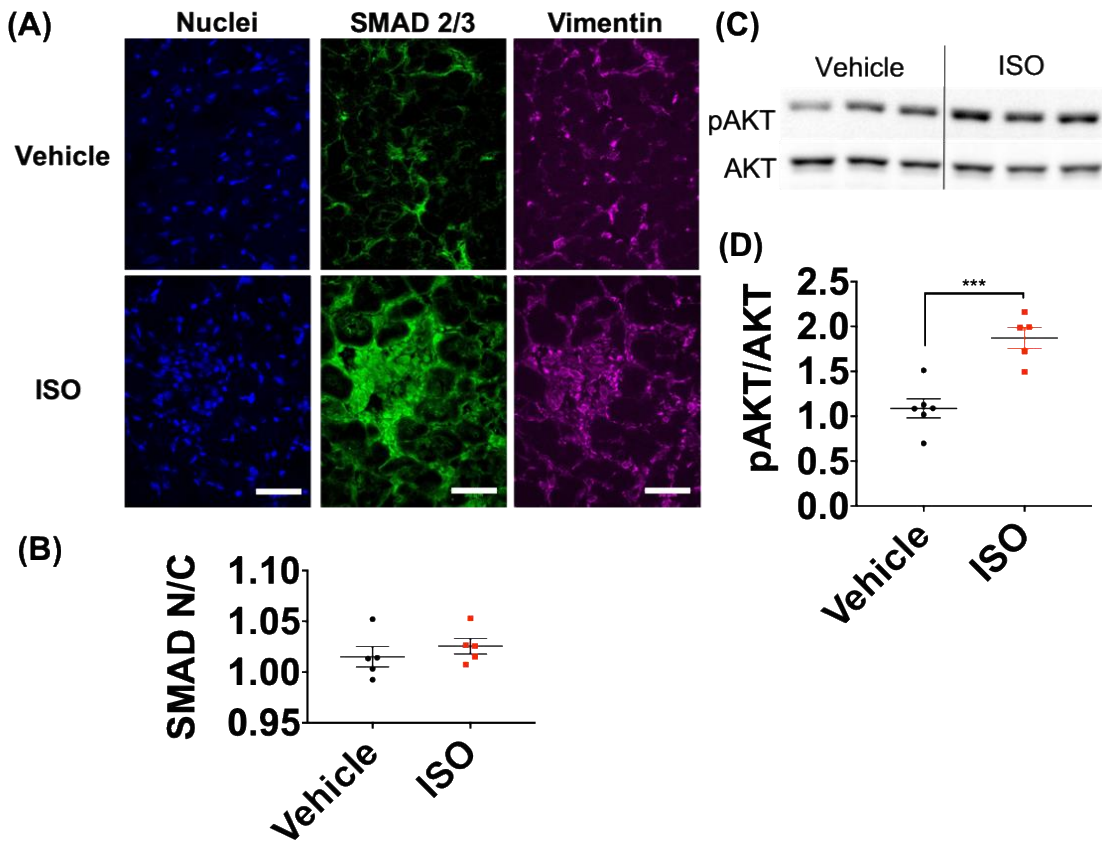

(A) Images of Nuclei, blue, SMAD 2/3, green, and Vimentin, pink, staining in tissue sections (40X objective, scale bar is 50 μm). (B) Quantification of SMAD 2/3 nuclear/cytoplasmic (N/C) intensity, N=5 rats, Unpaired T-test, non-significant. (C) Images of Western blot of pAKT/AKT1 in left ventricle rat tissue in Vehicle and ISO treated rats (treated 7 days with ISO at 4mg/kg/day). (D) Quantification of pAKT to total AKT from Western blot, N=6, Unpaired T-test,  $P \leq 0.001$  (\*\*\*).

**Figure S3. Atomic force microscopy (AFM) measurements of 10 $\mu$ m thick left ventricle cryosectioned tissue from male Sprague Dawley rats treated with vehicle or isoproterenol (ISO) 4mg/kg/day for 7 days.**

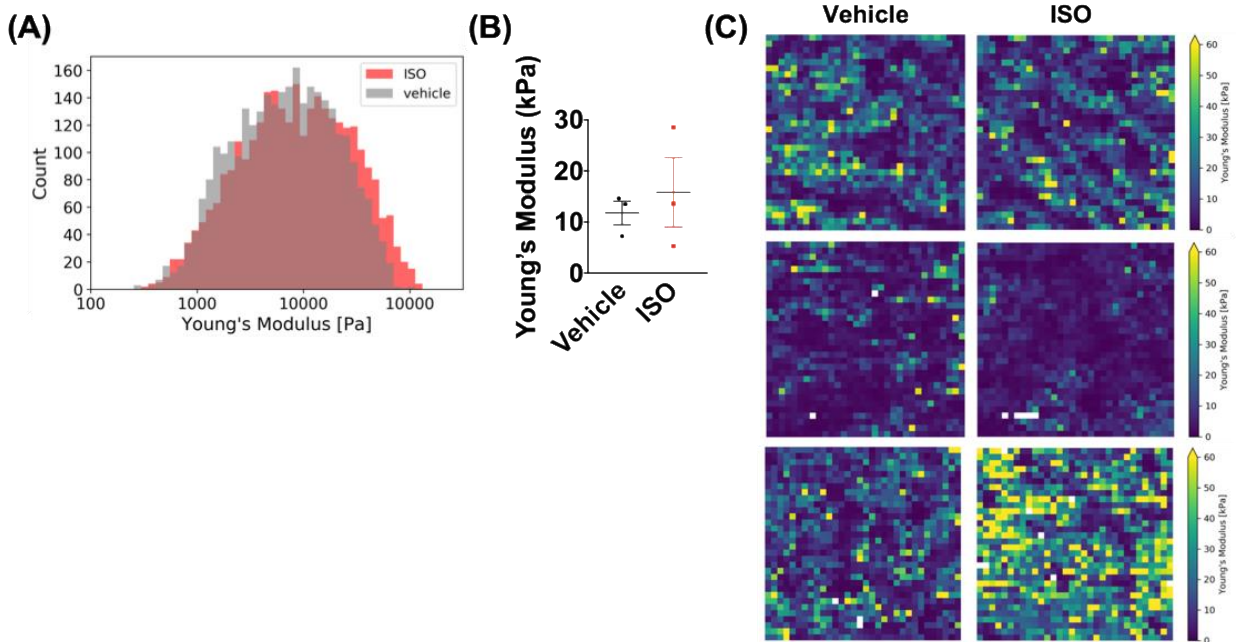

**(A)** Histogram of pixels binned for modulus measurements for pooled data (Scan area: 90  $\mu$ m x 90 $\mu$ m (32 x 32 pixels), N=3 rats with data pooled for vehicle and ISO). **(B)** Average Young's Modulus for vehicle and ISO treated rats (N=3 for vehicle and ISO, error bars show mean and SEM). **(C)** Heat maps of AFM tissue measurements showing Young's Modulus (Scan area for images: 90  $\mu$ m x 90 $\mu$ m (32 x 32 pixels), 1 section per rat, N=3 rats for vehicle and ISO).

**Figure S4. Cytokines that correlate significantly with either (A) alpha-smooth muscle actin ( $\alpha$ SMA) intensity (immunofluorescence) (left) or (B) Periostin expression (measured by RT-qPCR) (right), averages of 3 replicates are plotted.**

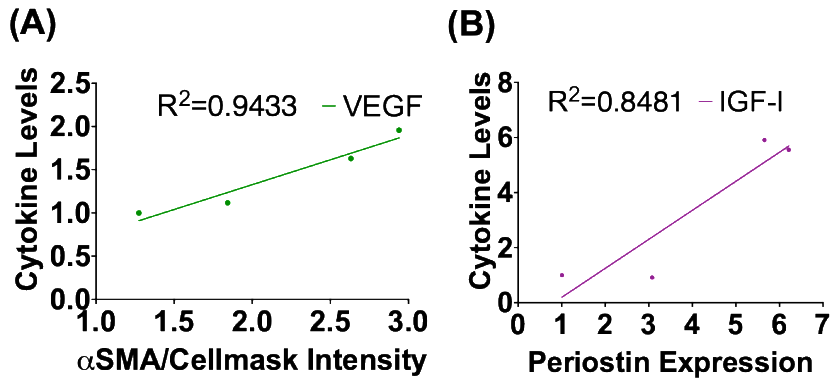

VEGF=vascular endothelial growth factor, IGF-1=insulin growth factor 1.

**Figure S5. Osteopontin (OPN) ELISA and Lysyl Oxidase (LOX) activity assay on cardiac fibroblast conditioned media.**

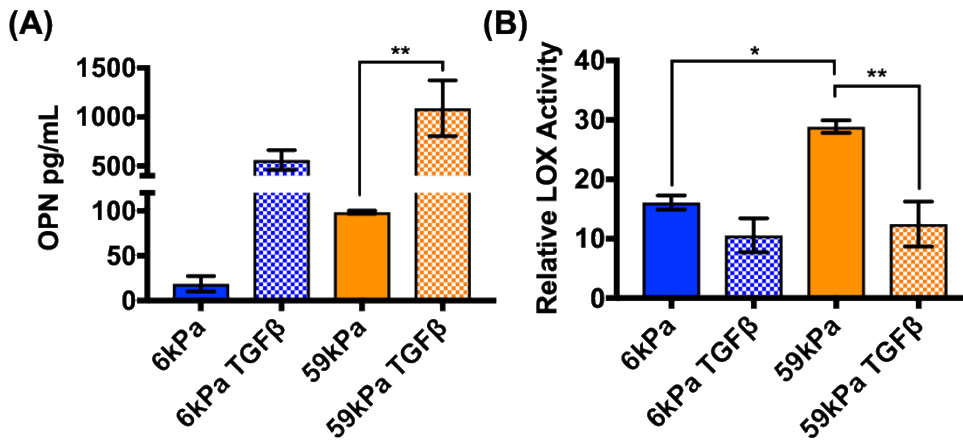

(A) OPN ELISA (N=3, error bars show mean and SEM, One-way ANOVA,  $P \leq 0.01$  (\*\*)). (B) LOX activity assay (N=3, error bars show mean and SEM, One-way ANOVA,  $P \leq 0.05$  (\*),  $P \leq 0.01$  (\*\*)).
